# Supplementary material for: Photocatalytic and antibacterial activity of graphene oxide/cellulose-doped TiO2 quantum dots: in silico molecular docking studies
Source: Royal Society of Chemistry journal article supplement (doi:10.1039/d2na00383j), 2022-01-01
Supplement: d2na00383j1.pdf [file d2na00383j1.pdf]

## Supplementary Material

### Photocatalytic and Antibacterial activity of graphene oxide/cellulose-doped TiO<sub>2</sub> quantum dots: In silico molecular docking studies

Muhammad Ikram<sup>a\*</sup>, Fahad Rasheed<sup>b</sup>, Ali Haider<sup>c</sup>, Sadia Naz<sup>d</sup>, Anwar Ul-Hamid<sup>e\*</sup>, Anum Shahzadi<sup>e</sup>, Junaid Haider<sup>f</sup>, Iram Shahzadi<sup>g</sup>; Shaukat Hayat<sup>b</sup>, Salamat Ali<sup>b</sup>

<sup>a</sup>Solar Cell Application Research Lab, Department of Physics, Government College University Lahore, Lahore, 54000, Punjab, Pakistan

<sup>b</sup>Department of Physics, Riphah Institute of Computing and Applied Sciences (RICAS), Riphah International University, 14 Ali Road, Lahore, Pakistan

<sup>c</sup>Department of Clinical Sciences, Faculty of Veterinary and Animal Sciences, Muhammad Nawaz Shareef University of Agriculture, Multan, 66000, Pakistan

<sup>d</sup>Tianjin Institute of Industrial Biotechnology, Chinese Academy of Sciences, Tianjin 300308, China.

<sup>e</sup>Core Research Facilities, King Fahd University of Petroleum & Minerals, Dhahran, 31261, Saudi Arabia

<sup>f</sup>Faculty of Pharmacy, The University of Lahore, Lahore, Pakistan

<sup>g</sup>Punjab University College of Pharmacy, University of the Punjab, 54000, Pakistan

\*Corresponding authors emails: <sup>a</sup>dr.muhammadikram@gcu.edu.pk, <sup>e</sup>anwar@kfupm.edu.sa

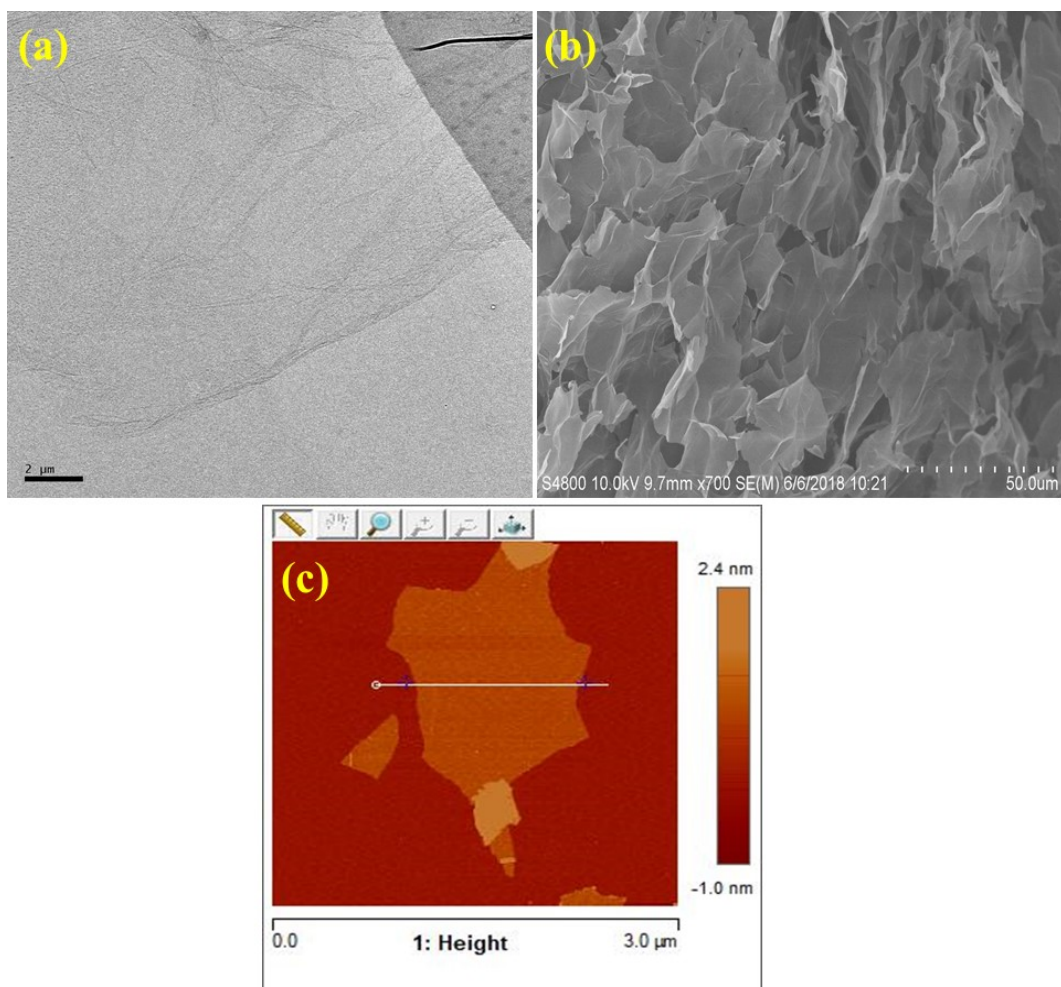

**Fig. S1:** (a) HR-TEM, (b) SEM, and (c) Atomic Force Microscopy images of GO

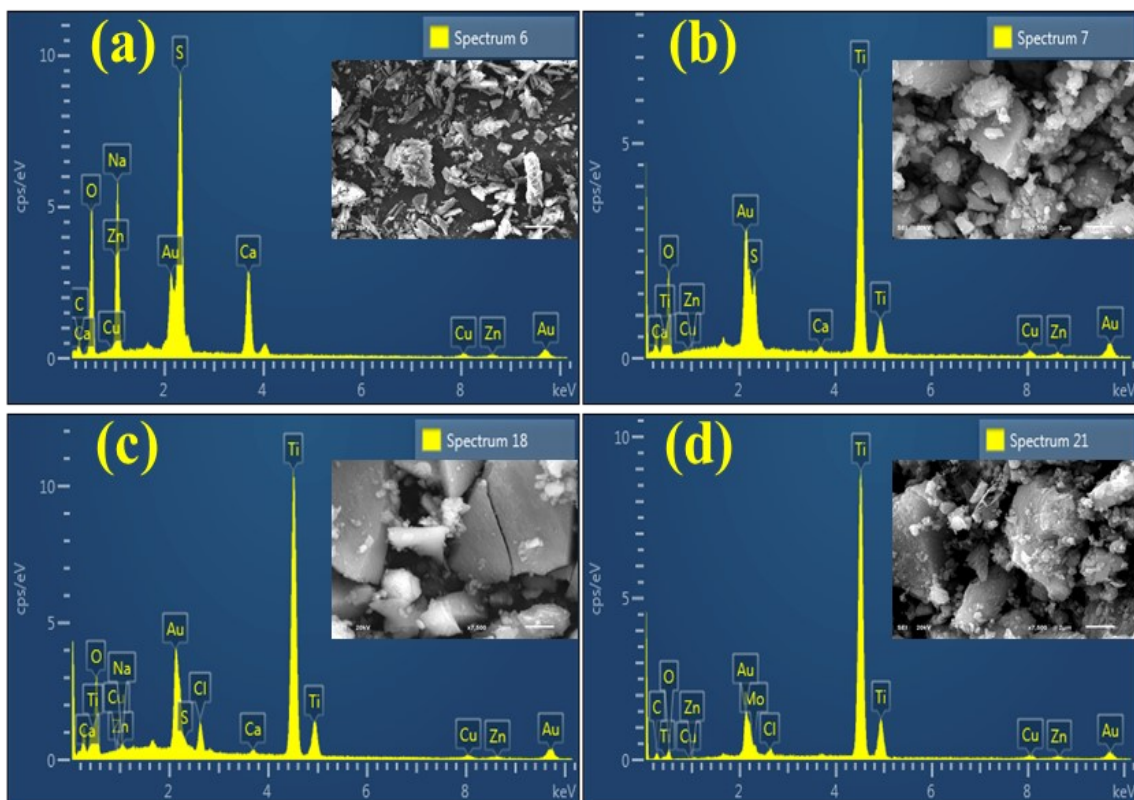

**Fig. S2:** Energy dispersive x-ray spectroscopy (EDS) results obtained from (a) CNC, (b)  $\text{TiO}_2$ , (c)  $\text{CNC}:\text{TiO}_2$  and (d)  $\text{GO}:\text{CNC}:\text{TiO}_2$

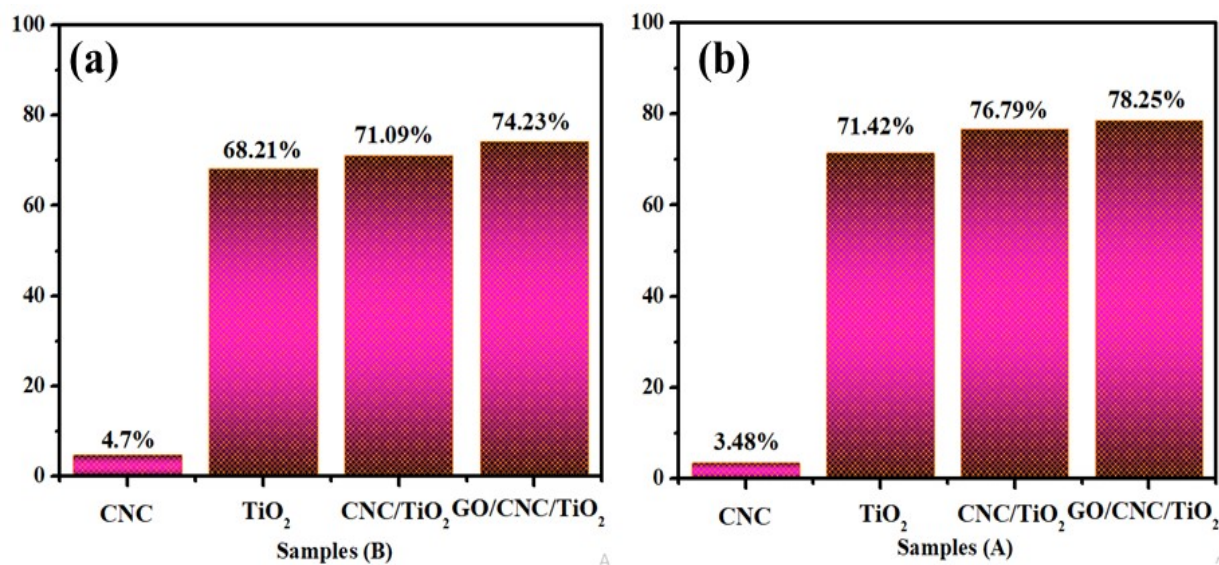

**Figure S3.** Photocatalysis of CNC,  $\text{TiO}_2$ ,  $\text{CNC}/\text{TiO}_2$ ,  $\text{GO}/\text{CNC}/\text{TiO}_2$  in (a) basic and (b) acidic medium, respectively

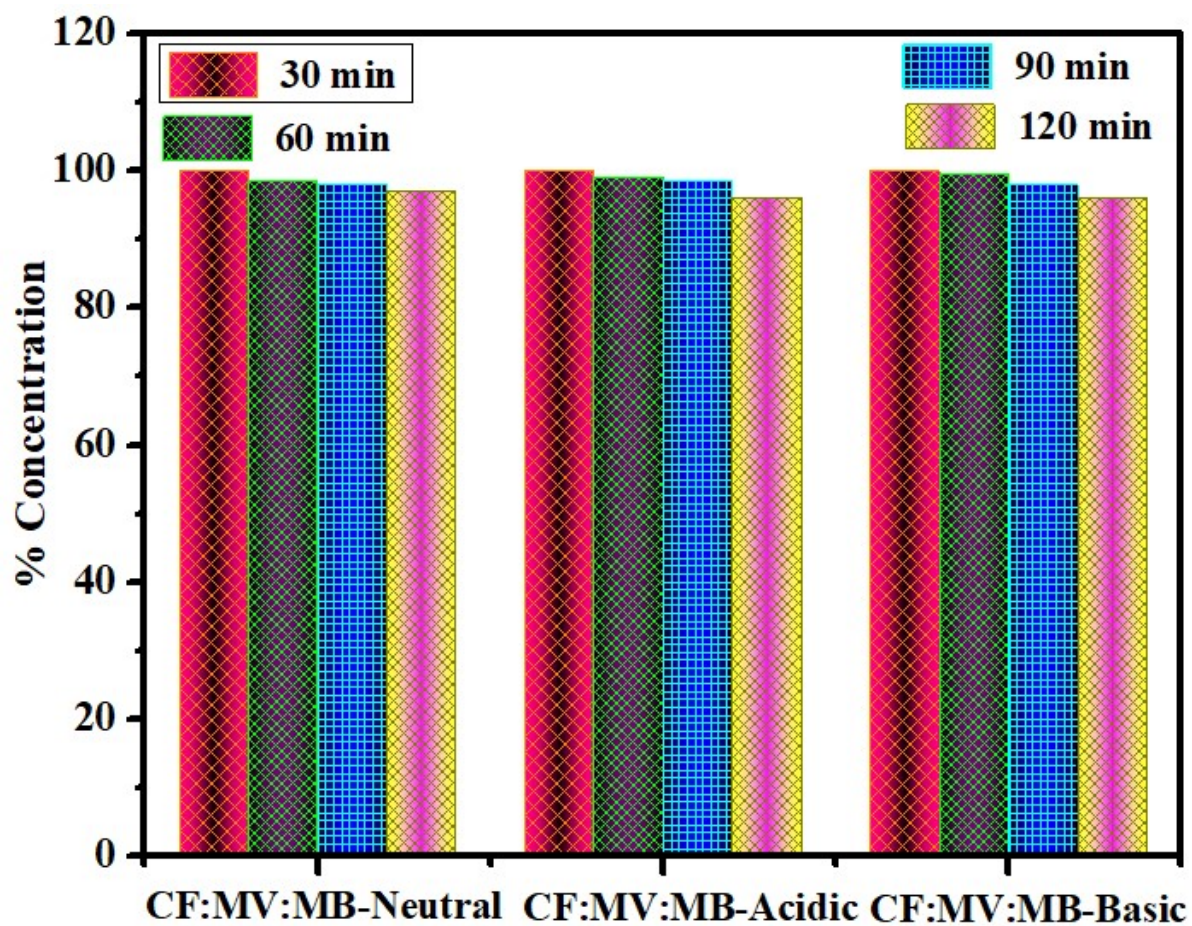

Figure S4. Dye degradation in the dark for comparison.

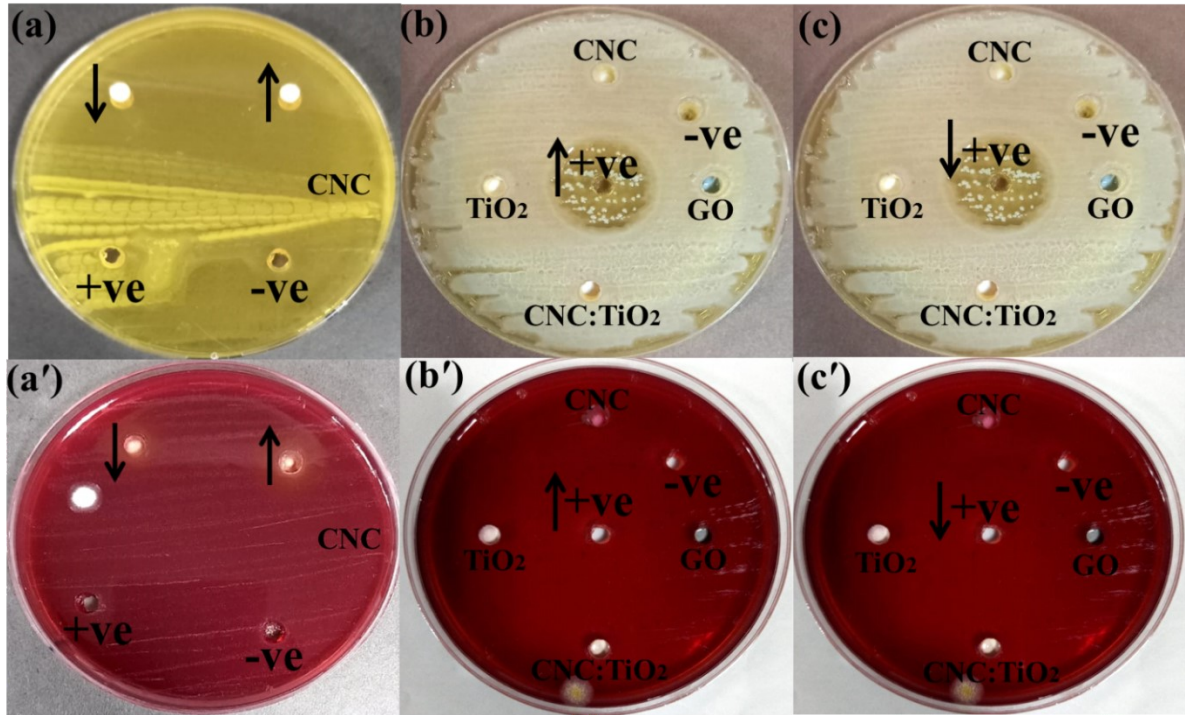

Fig. S5: In vitro antibacterial activity of (a, a') CNC and (b, b'-c, c') bare and doped TiO<sub>2</sub> for low and high concentration against SA and EC, respectively.

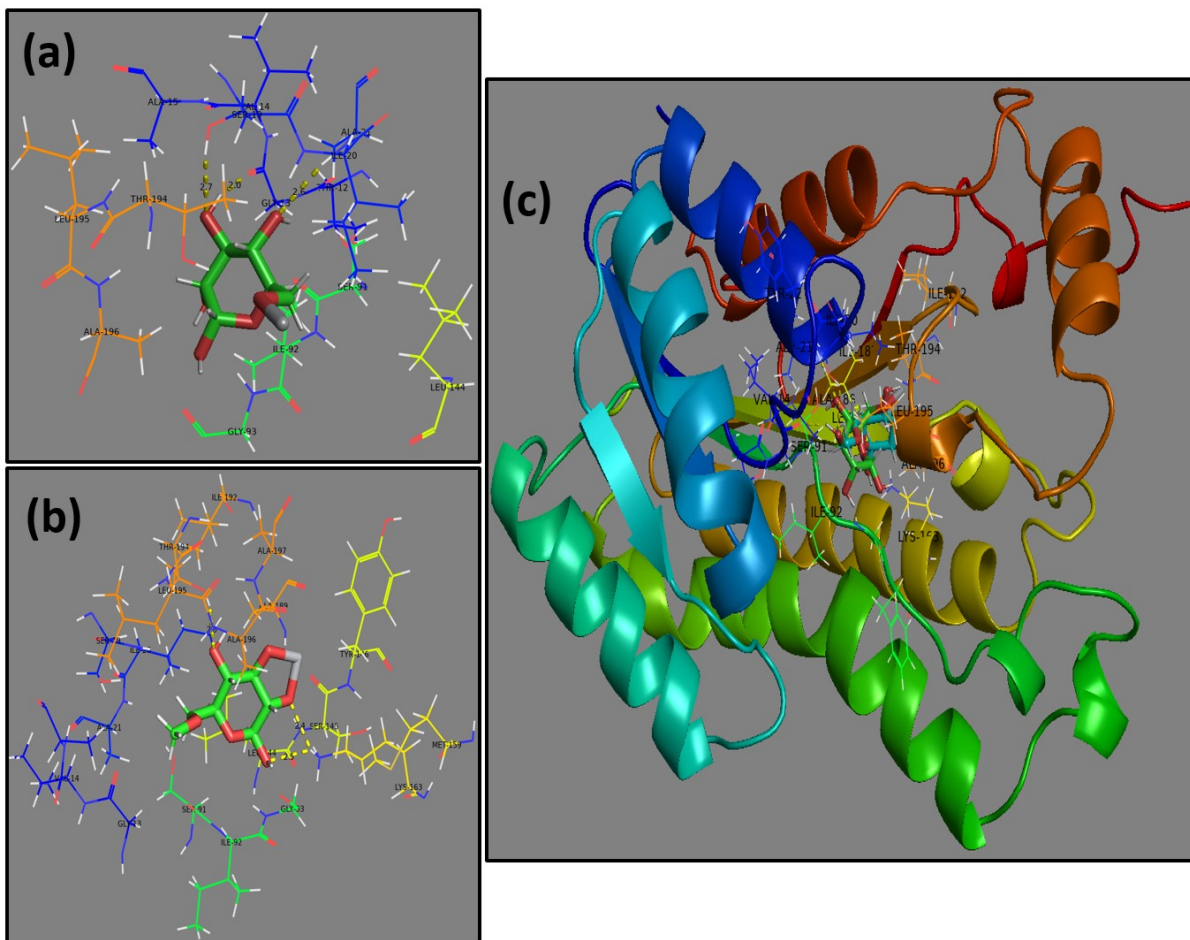

**Figure S6:** Binding interaction pattern inside active pocket of FabI from *E. coli* (a). TiO<sub>2</sub>-CNC, (b). GO/CNC-doped TiO<sub>2</sub>, (c). Superimposed docked complexes of TiO<sub>2</sub>-CNC and GO/CNC-doped TiO<sub>2</sub> with FabI

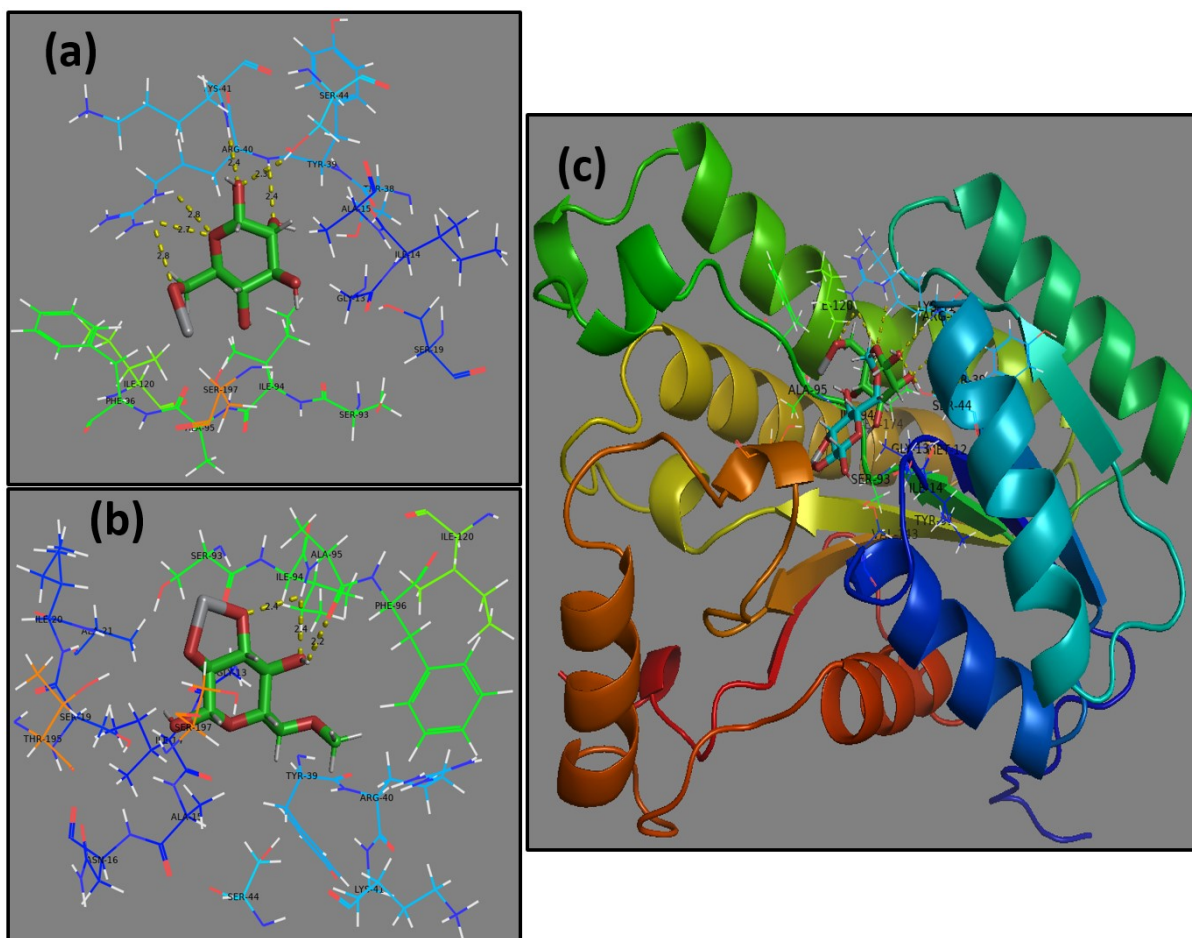

**Figure S7:** Binding interaction pattern inside active pocket of FabI from *S. aureus* (a). TiO<sub>2</sub>-CNC, (b). GO/CNC-doped TiO<sub>2</sub>, (c). Superimposed docked complexes of TiO<sub>2</sub>-CNC and GO/CNC-doped TiO<sub>2</sub> with FabI

Figure S8 demonstrated that the MB degradation occurs around  $\lambda$  of 665 nm for MV = 605 and CF = 290 nm, respectively. Dyes degrade gradually under illumination upon doping GO/CNC doped TiO<sub>2</sub>, while observed UV-Vis spectra are given below.

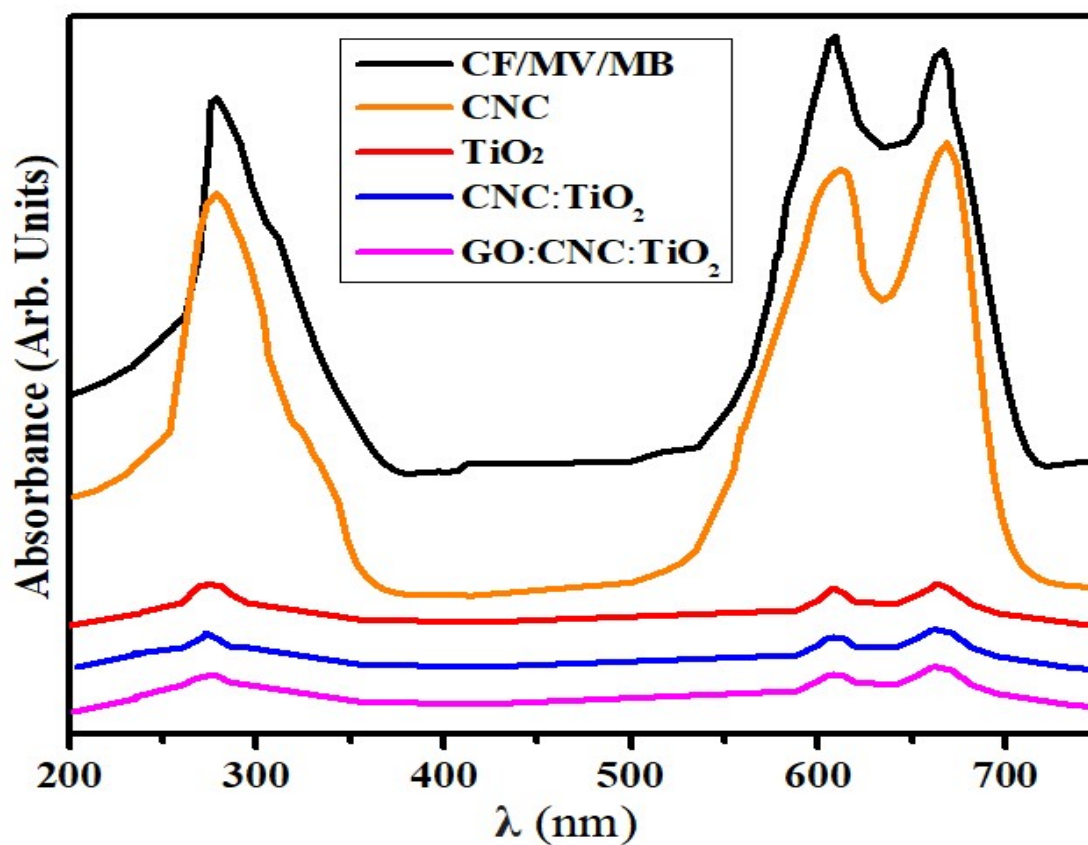

**Figure S8.** Represents the CF, MV, and MB absorption peaks for the neutral medium of the prepared sample

Table S1 Bactericidal action of GO/CNC:TiO<sub>2</sub>

| Samples                 | <i>S. aureus</i>                  |           | <i>E. coli</i>                    |           |
|-------------------------|-----------------------------------|-----------|-----------------------------------|-----------|
|                         | Inhibition zone <sup>a</sup> (mm) |           | Inhibition zone <sup>b</sup> (mm) |           |
|                         | 1 %                               | 2 %       | 1 %                               | 2 %       |
| CNC                     | 0.95±0.05                         | 1.67±0.06 | 3.36±0.07                         | 4.49±0.05 |
| TiO <sub>2</sub>        | 0±0.00                            | 1.26±0.03 | 0±0.00                            | 0±0.00    |
| CNC:TiO <sub>2</sub>    | 0±0.00                            | 1.73±0.07 | 3.17±0.02                         | 4.52±0.02 |
| GO/CNC:TiO <sub>2</sub> | 1.03±0.12                         | 2.10±0.05 | 3.49±0.05                         | 5.21±0.02 |
| Ciprofloxacin           | 7.75±0.00                         | 7.75±0.00 | 7.15±0.00                         | 7.15±0.00 |
| DIW                     | 0±0.00                            | 0±0.00    | 0±0.00                            | 0±0.00    |

<sup>a</sup> Inhibition zone (mm) of GO/CNC-doped TiO<sub>2</sub> for *S. aureus*

<sup>b</sup> Inhibition zone measurements for *E. coli*.
